# Supplementary material for: Grape seed meal by-product is able to counteract oxidative stress induced by lipopolysaccharide and dextran sulphate in IPEC cells and piglets after weaning
Source: PLOS journal article supplement (doi:10.1371/journal.pone.0283607), 2023-04-13
Supplement: S3 (10.1371/journal.pone.0283607.s003) [file journal.pone.0283607.s003]

**Gel 1 – Colon samples – total lysate – beta-actin**

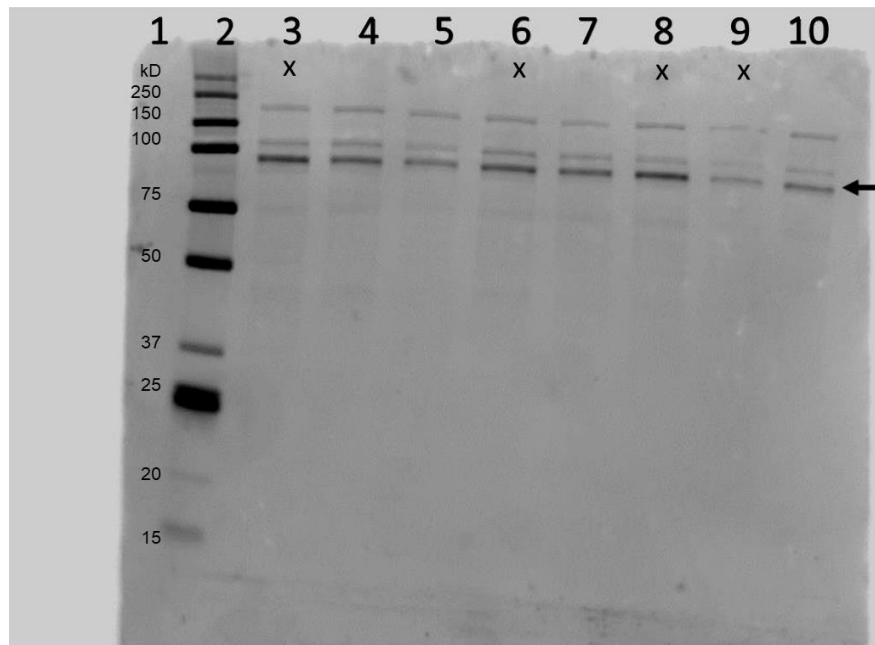

**1- molecular weight marker**

**2 - Control 1**

**3 – control 2**

**4 – GSM 1**

**5 – GSM 2**

**6 – DSS +GSM 1**

**7 – DSS +GSM 2**

**8 – DSS 1**

**9 – DSS 2**

**10 – sample buffer**

The image was captured with MicroChemi Imager, and was used to generate the blot image presented in Figure 2.B. in the manuscript. Lanes marked with X were not included in the final Figure.

## Gel 2 – Colon samples – total lysate – Nrf2

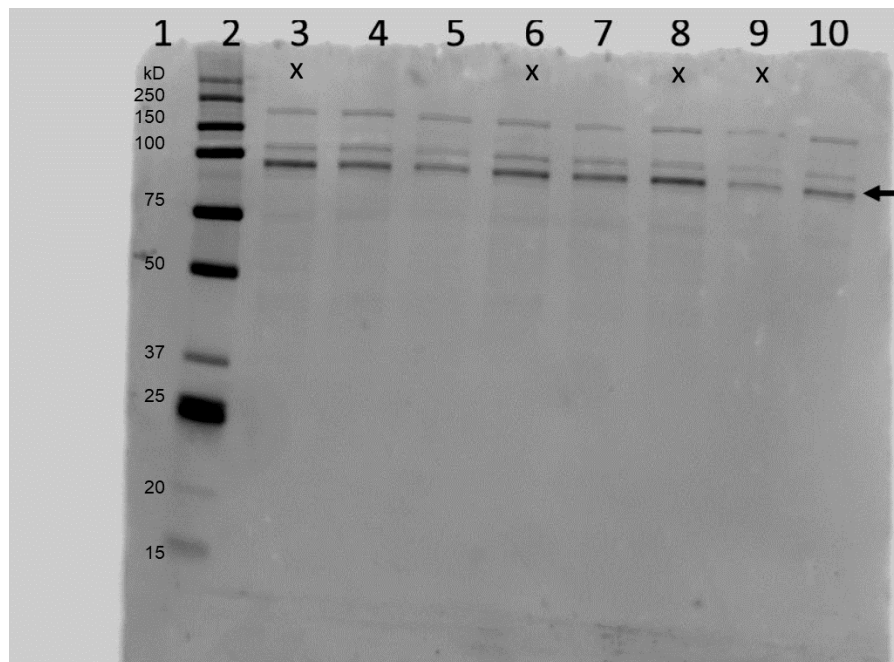

**1- sample buffer**

**2 - molecular weight marker**

**3 - Control 1**

**4 – control 2**

**5 – GSM 1**

**6 – GSM 2**

**7 – DSS + GSM 1**

**8 – DSS + GSM 2**

**9 – DSS 1**

**10 – DSS 2**

The image was captured with MicroChem Imager, and was used to generate the blot image presented in Figure 2.B. in the manuscript. Lanes marked with X were not included in the final Figure.

**Gel 3 – Mesenteric lymph nodes samples – total lysate – beta-actin**

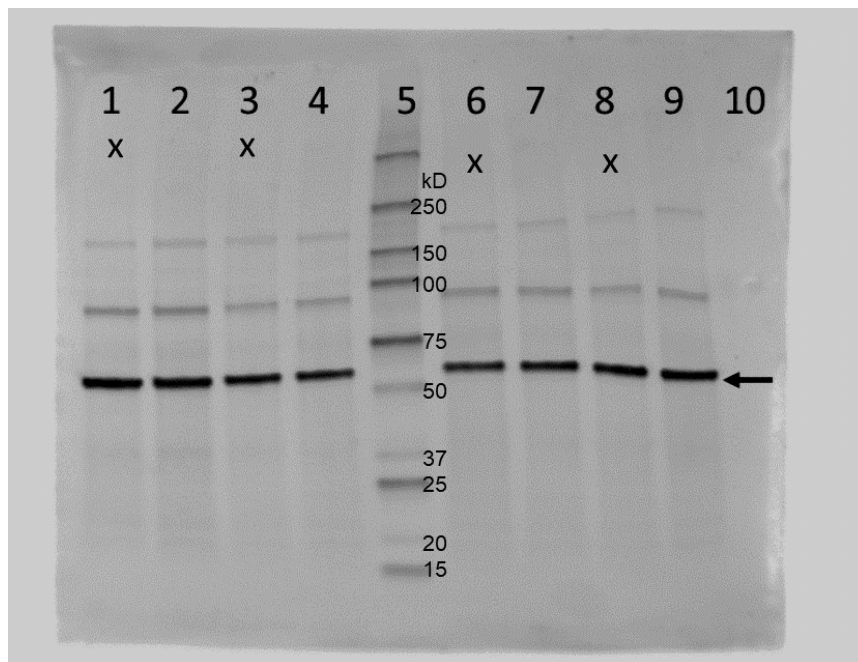

**1 - Control 1**

**2 – control 2**

**3 – GSM 1**

**4 – GSM 2**

**5- molecular weight marker**

**6 – DSS 1**

**7 – DSS 2**

**8 – DSS + GSM 1**

**9 – DSS + GSM 2**

**10 – sample buffer**

The image was captured with MicroChemi Imager, and was used to generate the blot image presented in Figure 2.B. in the manuscript. Lanes marked with X were not included in the final Figure.

**Gel 4 – Mesenteric lymph nodes samples – total lysate – Nrf2**

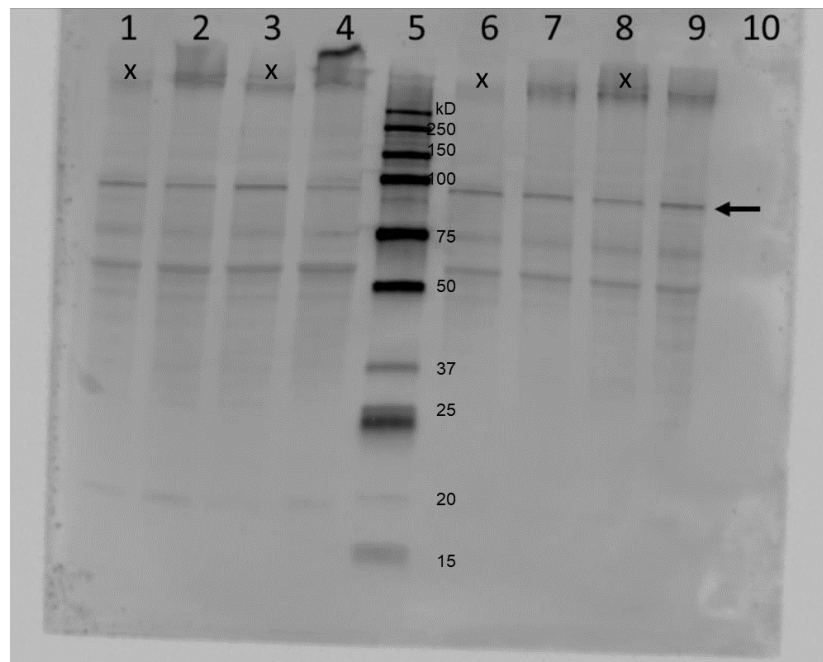

**1 - Control 1**

**2 – control 2**

**3 – GSM 1**

**4 – GSM 2**

**5- molecular weight marker**

**6 – DSS 1**

**7 – DSS 2**

**8 – DSS + GSM 1**

**9 – DSS + GSM 2**

**10 – sample buffer**

The image was captured with MicroChemi Imager, and was used to generate the blot image presented in Figure 2.B. in the manuscript. Lanes marked with X were not included in the final Figure.
